# Supplementary material for: Phase 1 safety, pharmacokinetic and pharmacodynamic study of the cyclin-dependent kinase inhibitor dinaciclib administered every three weeks in patients with advanced malignancies
Source: PubMed Central journal article supplement — Br J Cancer. 2017 Aug 31;117(9):1258–68. doi: 10.1038/bjc.2017.288 (PMC5672931; doi:10.1038/bjc.2017.288), 2017-08-31
Supplement: bjc2017288x1.pdf [file bjc2017288x1.pdf]

## Supplementary Methods

### *Ex-vivo lymphocyte stimulation assay*

In part 1, samples were collected before dosing and at 2, 3, 4, 6, and 8 hours after dosing on day 1 of cycle 1, as well as on day 8 and day 15. Patients in part 2 receiving 8-hour infusions had samples collected before dosing and 1, 4, 8, 10, and 11 hours after start of the infusion on day 1 of cycle 1, as well as on days 8 and 15. For patients receiving 24-hour infusions, samples were collected pre-dose and 1, 6 to 8, 24, 26, and 30 hours after the start of the first infusion, as well as on days 8 and 15. Whole blood isolated from patients (40  $\mu$ l) was diluted with RPMI-1640 media (140  $\mu$ l) and was treated with phytohemagglutinin (PHA; 2  $\mu$ l) to stimulate lymphocyte proliferation. Following a 30-minute exposure to bromodeoxyuridine (BrdU; 10  $\mu$ l), cells were harvested and stained using an FITC-conjugated antibody specific for BrdU, counterstained with propidium iodide/RNase A, and analyzed using a FACSCalibur flow cytometer. Approximately 35% to 40% of the CD45-positive cells in the whole blood incorporate BrdU following PHA stimulation under conditions defined in this assay, indicating DNA synthesis and cell division. Samples with less than 5% BrdU incorporation post-treatment was classified as demonstrating a pharmacodynamic effect. To explore the relationship between exposure and bioactivity of dinaciclib, %BrdU incorporation was correlated with the amount of dinaciclib found in plasma samples taken at the same time.

*Immunohistochemistry for Rb, phospho-Rb and other cell cycle targets*

Antibodies were as follows:

| <b>Antibody</b>     | <b>Source</b>               | <b>Dilution</b> |
|---------------------|-----------------------------|-----------------|
| Total Rb            | BD Biosciences              | 1:75            |
| Rb [pT356]          | Invitrogen                  | 1:800           |
| Rb [pS795]          | Cell Signaling Technologies | 1:25            |
| Rb [pS249/T252]     | Invitrogen                  | 1:500           |
| Rb [S807/811]       | Cell Signaling Technologies | 1:100           |
| Rb [S780]           | Cell Signaling Technologies | 1:50            |
| p27 <sup>Kip1</sup> | BD Biosciences              | 1:50            |
| cyclin D1           | Neomarkers                  | 1:40            |
| p53                 | Immunotech                  | 1:500           |
| Ki-67               | Vector Labs                 | 1:250           |

For skin biopsies, immunohistochemical data were quantified using Aperio image analysis; nuclei were scored as 0, 1+, 2+, or 3+ and the percent positive cells was determined. For tumor biopsies, 100-200 cells were scored manually as 0, 1+ or 2+, and the percent positive cells determined. Alternatively, since tumor biopsies obtained from melanoma patients could be complicated by melanin deposits, immunohistochemistry was also performed using a Texas red secondary antibody (Vulcan Fast Red, Biocare Medical) and quantified using Aperio image analysis, as for the skin biopsies.

## Supplementary Table 1

### Dose Levels and Dose Limiting Toxicities

#### a) 2-Hour Infusions

| Dose Level (mg/m <sup>2</sup> ) | No of Subjects Treated | No of Subjects with DLT in Cycle 1 | DLT (n)                                                                                            |
|---------------------------------|------------------------|------------------------------------|----------------------------------------------------------------------------------------------------|
| 1.85                            | 1                      | 0                                  |                                                                                                    |
| 3.7                             | 1                      | 0                                  |                                                                                                    |
| 7.4                             | 1                      | 0                                  |                                                                                                    |
| 14.8                            | 1                      | 0                                  |                                                                                                    |
| 29.6                            | 6                      | 1                                  | bacterial sepsis (without neutropenia)                                                             |
| 41.4                            | 6                      | 1                                  | neutropenic fever                                                                                  |
| → 50                            | 15                     | 4                                  | elevated AST (1)<br>hypotension (1)<br>elevated AST and elevated uric acid (1)<br>elevated ALT (1) |
| 58                              | 4                      | 2                                  | pancytopenia and pneumonia (1)<br>neutropenic fever (1)                                            |

#### b) 8-Hour Infusions

| Dose Level (mg/m <sup>2</sup> ) | No of Subjects Treated | No of Subjects with DLT in Cycle 1 | DLT (n)                                            |
|---------------------------------|------------------------|------------------------------------|----------------------------------------------------|
| 50                              | 2                      | 2                                  | neutropenia (1)<br>neutropenic fever (1)           |
| 41.4                            | 2                      | 2                                  | neutropenic fever (1)<br>hypotension (1)           |
| 29.6                            | 3                      | 3                                  | syncope (1)<br>neutropenia (1)<br>elevated AST (1) |
| 14.8                            | 3                      | 2                                  | Neutropenia (1)<br>elevated AST (1)                |
| → 7.4                           | 6                      | 0                                  |                                                    |

#### c) 24-Hour Infusions

| Dose Level (mg/m <sup>2</sup> ) | No of Subjects Treated | No of Subjects with DLT in Cycle 1 | DLT                                     |
|---------------------------------|------------------------|------------------------------------|-----------------------------------------|
| 7.4                             | 4                      | 0                                  |                                         |
| → 10.4                          | 3                      | 0                                  |                                         |
| 14.6                            | 3                      | 2                                  | increased bilirubin (1)<br>delirium (1) |

→ RP2D

## Supplementary Table 2

### Patients achieving prolonged stable disease for > 6 cycles of dinaciclib

| Subject Diagnosis        | Dinaciclib Infusion Time | Dinaciclib Dose Level  | Response by RECIST | Number of Cycles |
|--------------------------|--------------------------|------------------------|--------------------|------------------|
| Leiomyosarcoma           | 2-hour                   | 41.4 mg/m <sup>2</sup> | Stable Disease     | 8                |
| Anal cancer              |                          | 50 mg/m <sup>2</sup>   | Stable Disease     | 6                |
| SCC lung                 |                          | 50 mg/m <sup>2</sup>   | Stable Disease     | 15               |
| Prostate cancer          |                          | 50 mg/m <sup>2</sup>   | Stable Disease     | 30               |
| Chordoma                 |                          | 58 mg/m <sup>2</sup>   | Stable Disease     | 12               |
| Melanoma                 | 8-hour                   | 29.6 mg/m <sup>2</sup> | Stable Disease     | 6                |
| Neuroendocrine carcinoma |                          | 41.4 mg/m <sup>2</sup> | Stable Disease     | 22               |
| Liposarcoma              |                          | 50 mg/m <sup>2</sup>   | Stable Disease     | 8                |
| Ovarian carcinoma        | 2-hour AB sequence       | 29.6 mg/m <sup>2</sup> | Stable Disease     | 6                |
| Rectal cancer            | 2-hour BA sequence       | 29.6 mg/m <sup>2</sup> | Stable Disease     | 6                |

AB and BA sequences were part of the randomized, 2-way crossover study examining pharmacokinetics of dinaciclib in the absence and presence of aprepitant (Zhang D, Mita M, Shapiro GI, Poon J, Small K, Tzontcheva A, *et al.* Effect of aprepitant on the pharmacokinetics of the cyclin-dependent kinase inhibitor dinaciclib in patients with advanced malignancies. *Cancer Chemother Pharm* 2012; 70:891-8).

## Supplementary Figure Legends

**Supplementary Figure 1.** Biphasic pattern of neutropenia in a representative patient.

Absolute neutrophil count followed over time demonstrates an acute fall within hours of dinaciclib administration, with rapid recovery. This is followed by a recurrent decrease at day 8, consistent with a dinaciclib-mediated antiproliferative effect.

**Supplementary Figure 2.** Mean plasma dinaciclib concentration-time profiles. Profiles are shown after (A) 2-hour, (B) 8-hour, and (C) 24-hour intravenous infusions of dinaciclib at dose levels ranging from 1.85 to 58 mg/m<sup>2</sup>.

**Supplementary Figure 3.** Relationship of maximum reductions in absolute neutrophil count to dinaciclib pharmacokinetic parameters. The maximum decrease from baseline in ANC (expressed as percentage) was determined from each subject and correlated with (A) AUC or (B) C<sub>max</sub>. A sigmoid maximum effect (E<sub>max</sub>) model was selected to describe the data.

**Supplementary Figure 4.** Effect of dinaciclib on the proliferation of peripheral blood lymphocytes stimulated *ex-vivo* with phytohemagglutinin (PHA). Results from representative patients treated with dinaciclib are shown for 8-hour intravenous infusions. BrdU = bromodeoxyuridine; D = day

**Supplementary Figure 5.** Effect of dinaciclib on CDK and cell cycle targets in keratinocytes.

Results from skin biopsies taken prior to treatment after an 8-hour intravenous infusion are shown. (A) The results confirm the reduction in Rb [pT356] after dinaciclib and absent or modest effects on Rb [pS807/S811], total Rb and Ki-67, similar to results for 2-hour infusions. Effects on Rb [pS249/T252] are more pronounced after 8-hour infusions among this small sample set. (B) As with 2-hour infusions, dinaciclib produces little change in expression of p27<sup>Kip1</sup>, with increased expression of p53.

**Supplementary Figure 6.** Early metabolic effects of dinaciclib in solid tumor patients. (A)

FDG-PET scans obtained pre-treatment and at cycle 1, day 8 in a patient with cholangiocarcinoma treated at 50 mg/m<sup>2</sup> over 2 hours. (B) FDG-PET scans obtained pre-treatment and at cycle 1, day 8 in a patient with liposarcoma, who received 50 mg/m<sup>2</sup> over 8 hours. Abdominal CT obtained after 2 cycles of study treatment demonstrates reduced density of hepatic metastases.

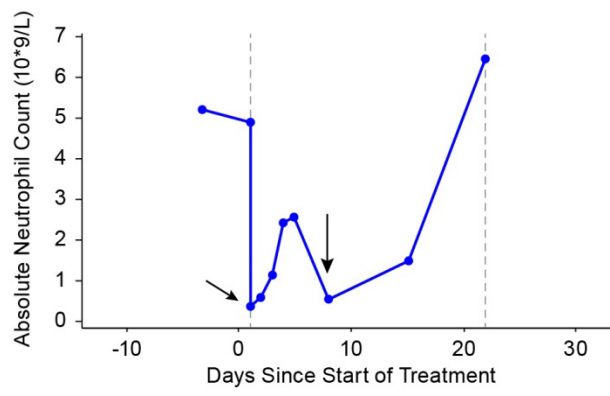

Figure S1

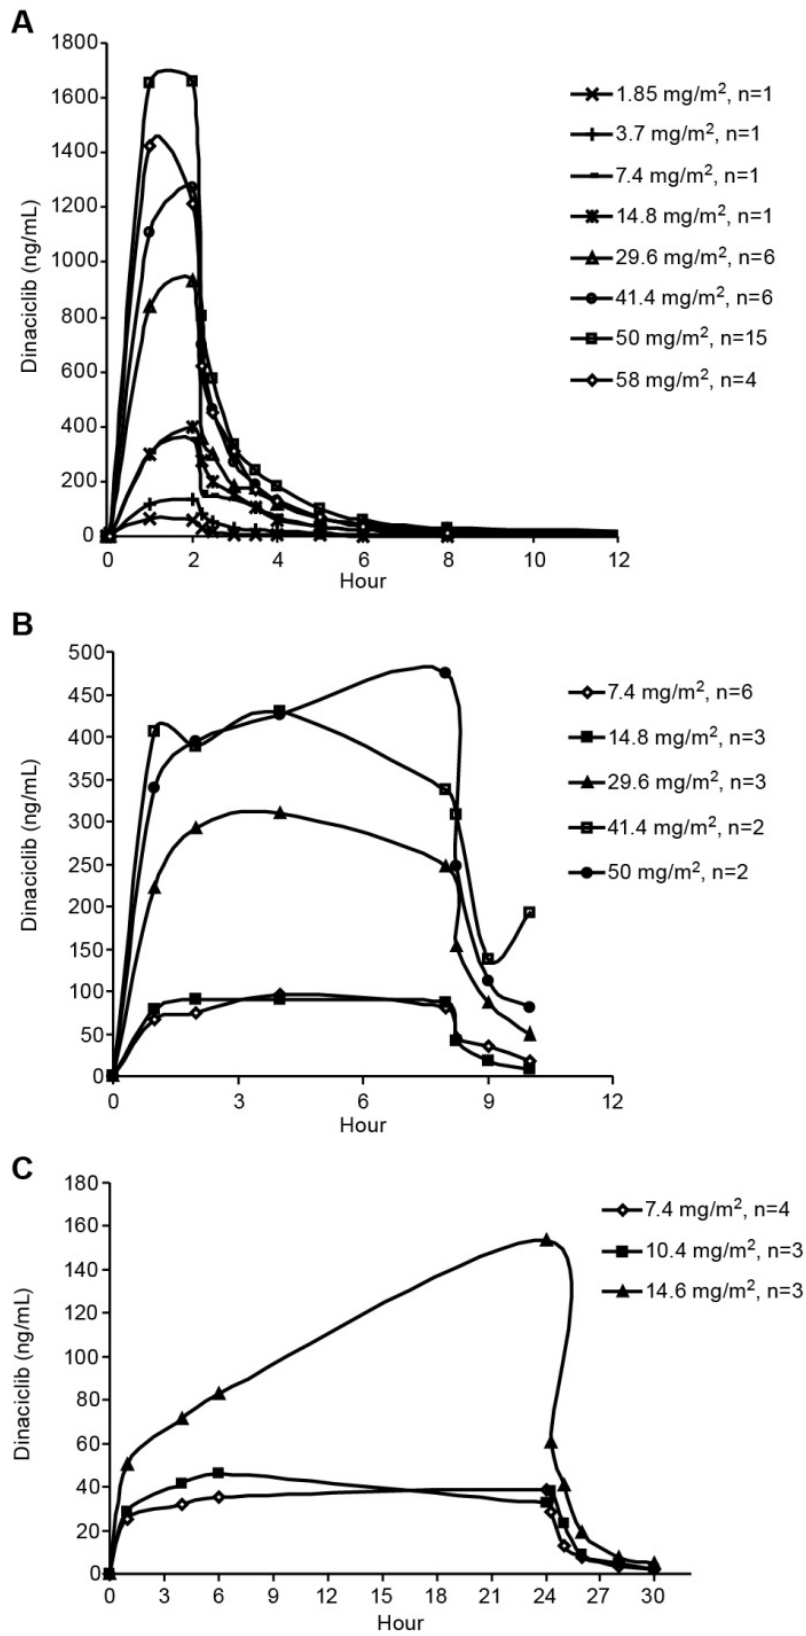

Figure S2



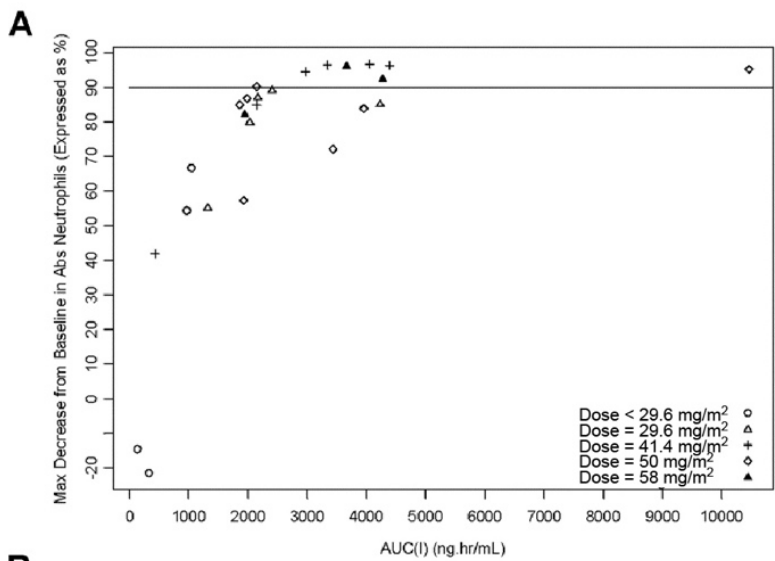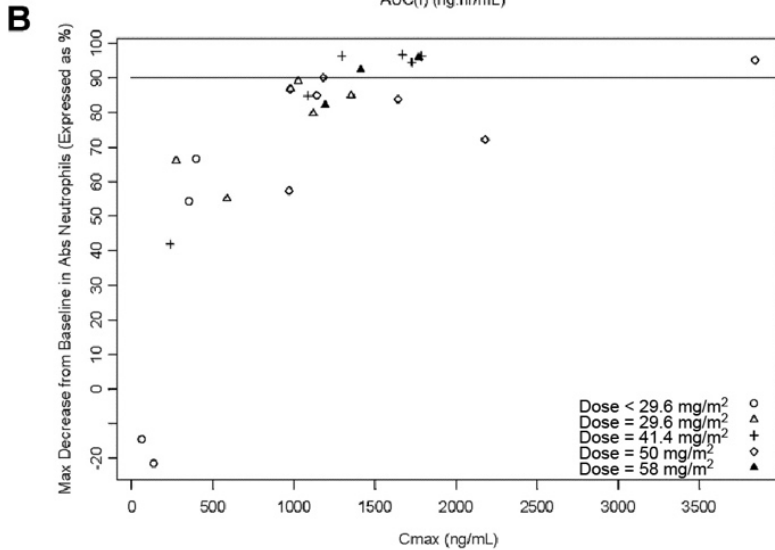

**Figure S3**

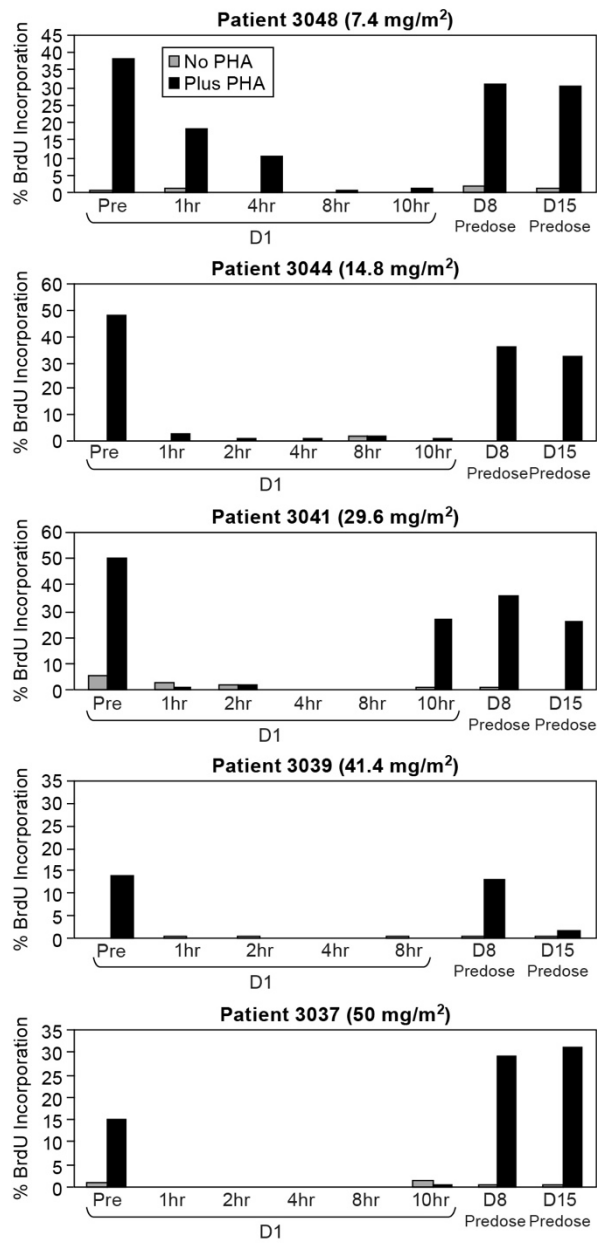

Figure S4

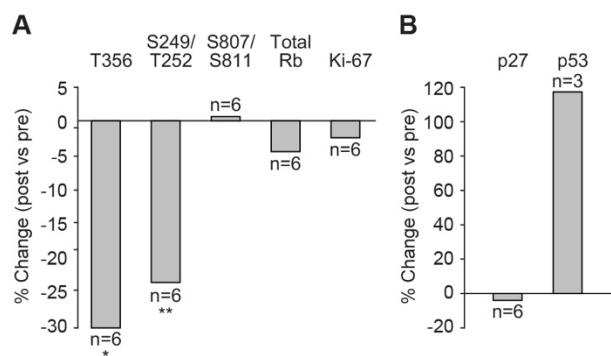

**Figure S5**

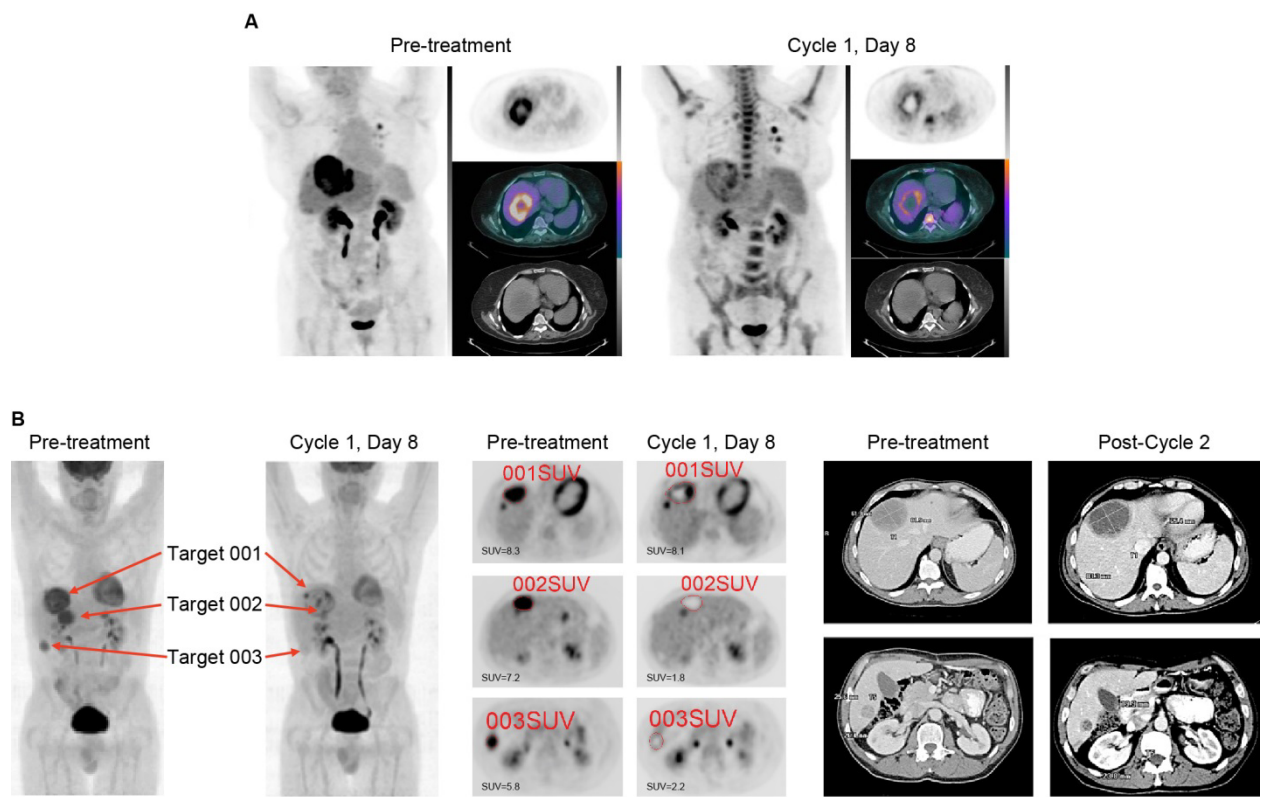

Figure S6
